# Phosphate Buffered Saline Containing Calcium and Magnesium Elicits Increased Secretion of Interleukin-1 Receptor Antagonist

Michael Lichtenauer, MD, Stefanie Nickl, MD, Konrad Hoetzenecker, MD, Andreas Mangold, MD, Bernhard Moser, MD, Matthias Zimmermann, MD, Stefan Hacker, MD, Tina Niederpold, MD, Andreas Mitterbauer, MD, Hendrik Jan Ankersmit, MD

(Department of Cardiac and Thoracic Surgery, Medical University Vienna, Vienna, Austria)

DOI: 10.1309/LMBMG5A7NOVBXWD

**Abstract**

**Objective:** Phosphate buffered saline (PBS) solutions are commonly used in laboratories for dilutions, washing cell suspensions, and rinsing, as well as additives to cell culture media. In the present study, we evaluated pro- and anti-inflammatory cytokine secretion of peripheral blood mononuclear cells (PBMCs) incubated in medium containing different PBS solutions.

**Methods:** Human PBMCs were incubated in cell culture medium with different concentrations of PBS containing calcium (Ca<sup>++</sup>) and magnesium (Mg<sup>++</sup>) (+/+ PBS). Cells in medium alone or in suspensions containing PBS without Ca<sup>++</sup> and Mg<sup>++</sup> (–/– PBS) served as controls.

**Results:** A dose-dependent increase of interleukin-1 receptor antagonist was found when PBMCs were cultured in medium

supplemented with increasing concentrations of +/+ PBS. No significant differences were observed for interleukin-1β, interleukin-4, interleukin-10, or transforming growth factor β.

**Conclusions:** The release of the anti-inflammatory cytokine interleukin-1 receptor antagonist in addition to unchanged levels of pro-inflammatory mediators suggests an important modulatory mechanism of heightened extracellular calcium levels.

Phosphate buffered saline (PBS) solutions are commonly used in laboratory protocols for dilutions, washing cell suspensions, and rinsing culture flasks and plates, as well as additives to cell culture media.<sup>1-6</sup> Phosphate buffered saline is commercially available in different formulations with calcium and magnesium (+/+ PBS) or without (–/– PBS) (Table 1).

Calcium functions as a major intracellular second messenger in many signal transduction pathways and triggers a broad range of cellular actions such as muscle contractility, hormone secretion, and vascular tone adjustment.<sup>7</sup> Furthermore, it was shown to influence cellular interactions in sepsis<sup>8</sup> and tissue inflammation.<sup>9</sup> Hotchkiss and colleagues described the impact of calcium on the production of a variety of cytokines such as tumor necrosis factor alpha and interleukin-1 beta (IL-1β),<sup>10</sup> both involved in the pathophysiology of sepsis. As heightened extracellular calcium concentrations can initiate an inflammatory cascade, we hypothesized whether the addition of –/– or +/+ PBS might have an influence on human peripheral blood mononuclear cells (PBMCs) under different culture conditions. These alterations of extracellular conditions might influence

several functions including secretion of cytokines, proliferative responses, and cell death.<sup>11</sup>

It has been recently shown that monocyte-macrophage cell lines can detect increasing extracellular calcium concentrations via the G-protein coupled calcium sensing receptor resulting in increased cytokine secretion (eg, transforming growth factor β [TGF-β]).<sup>12,13</sup> In addition, a similar response has been described in human keratinocytes. Bigler and colleagues observed heightened intracellular levels of interleukin-1 receptor antagonist (IL-1ra) when keratinocytes were exposed to increasing levels of extracellular calcium.<sup>14</sup> Binding of IL-1ra to the IL-1 receptor is thought to competitively inhibit IL-1 activity by binding to the IL-1 receptor without cellular activation. This data implies that induction of cytokine secretion (eg, IL-1ra) seems to be closely related to altered extracellular calcium levels.

Therefore, we planned to evaluate if the application of +/+ PBS had an impact on IL-1β or IL-1ra secretion by human PBMCs. Further, we sought to investigate other anti-inflammatory cytokines such as interleukin-4 (IL-4), interleukin-10 (IL-10),<sup>15,16</sup> or TGF-β.

**Table 1\_Phosphate Buffered Saline (PBS) Formulations**

|                                                                                | –/– PBS              |           | +/+ PBS              |           |
|--------------------------------------------------------------------------------|----------------------|-----------|----------------------|-----------|
|                                                                                | Concentration (mg/L) | Molarity  | Concentration (mg/L) | Molarity  |
| Calcium chloride (CaCl <sub>2</sub> )                                          | –                    | –         | 100                  | 0.900901  |
| Magnesium chloride (MgCl <sub>2</sub> •6H <sub>2</sub> O)                      | –                    | –         | 100                  | 0.492611  |
| Potassium chloride (KCl)                                                       | 200                  | 2.666667  | 200                  | 2.666667  |
| Potassium phosphate monobasic (KH <sub>2</sub> PO <sub>4</sub> )               | 200                  | 1.470588  | 200                  | 1.470588  |
| Sodium chloride (NaCl)                                                         | 8,000                | 137.93103 | 8,000                | 137.93103 |
| Sodium phosphate dibasic (Na <sub>2</sub> HPO <sub>4</sub> •7H <sub>2</sub> O) | 2,160                | 8.059702  | 2,160                | 8.059702  |

Formulations of phosphate buffered saline solutions (data supplied by Invitrogen Inc., USA)

## Methods

### Study Design

This study was conducted at the research laboratory of the Department of Cardiac and Thoracic Surgery (Medical University Vienna) according to the principles of the Helsinki Declaration and Good Clinical Practice and was approved by local authorities. Informed consent was obtained from all participants in this study. Major inclusion criteria were male or female, age 18 to 30 years, body mass index of 18 to 28 kg/m<sup>2</sup>, no intake of anti-inflammatory drugs during the last 2 weeks, no acute infection during the last month, no chronic inflammatory disease, and no physical activity prior to testing.

### Separation of Peripheral Blood Mononuclear Cells

Venous blood was drawn from healthy young volunteers (n=7). Anticoagulated blood specimens were processed immediately and PBMCs were separated by Ficoll density gradient centrifugation. Buffy coats with mononuclear cells were obtained, washed in Hanks balanced salt solution (HBSS), and resuspended in fresh RPMI 1640 medium (Invitrogen, Austria) supplemented with Glutamax (Invitrogen). Cell concentrations were determined on a Sysmex automated cell counter (Sysmex, USA).

### Cell Culture

PBMCs were seeded on 24-well cell culture plates (Perkin Elmer, Austria) at a concentration of  $1 \times 10^6$  per mL, containing 20% of either PBS (Invitrogen) with (+/+ PBS) or without calcium and magnesium (–/– PBS). For further investigations, increasing concentrations of +/+ PBS were added. Dilutions of 1.25×, 1.5×, and 2× +/+ PBS were generated from a stock solution of 10× +/+ PBS. Final molar concentrations for calcium and magnesium in medium supplemented with increasing dilutions of +/+ PBS were as follows: 1× +/+ PBS 0.50 mM Ca<sup>++</sup>, 0.50 mM Mg<sup>++</sup>, 1.25× +/+ PBS 0.64 mM Ca<sup>++</sup>, 0.52 mM Mg<sup>++</sup>, 1.5× +/+ PBS 0.69 mM Ca<sup>++</sup>, 0.55 mM Mg<sup>++</sup>, 2× +/+ PBS 0.78 mM Ca<sup>++</sup>, 0.60 mM Mg<sup>++</sup>. Autologous EDTA plasma was used to block Ca<sup>++</sup> dependent effects. In the control group, volumes were adjusted by adding fresh RPMI 1640 medium. Cell-free supernatants were collected by centrifugation after a culture period of 30 min, 1 h, 2 h, 3 h, and 24 h in an incubator at 37°C and kept frozen at –20°C until further testing.

### ELISA Evaluation of Cell Culture Supernatants

Supernatant levels of cytokines were measured using commercially available enzyme-linked immunosorbent assay (ELISA) kits for the quantification of IL-1ra, IL-1β, IL-4, IL-10, and TGF-β (Duoset; R&D Systems, USA) according to the manufacturer's protocol. In short, 96-well microtiter plates were coated overnight at room temperature with the appropriate capture antibody. After blocking of plates, samples of plasma, supernatants, and standard protein were added to the wells. After a washing step, a biotin-labeled antibody was added to each well and incubated for 2 h. Plates were washed and streptavidin-horseradish peroxidase was added. Color reaction was achieved using tetramethylbenzidine (TMB; Sigma Aldrich, USA) and was stopped by a sulphuric acid stop solution (Merck, Germany). Optical density values were measured

at 450 nm on an ELISA plate reader (Victor3 Multilabel plate reader, Perkin Elmer). The intra-assay coefficient of variation (CV) for IL-1ra was 4.6%; for IL-1β, 4.75%; for IL-4, 6.2%; for IL-10, 4.6%; and for TGF-β, 2.4%. Minimum detectable doses for IL-1ra were 2.15 pg/mL; for IL-1β, 1.0 pg/mL; for IL-4, 10.0 pg/mL; for IL-10, 3.9 pg/mL; and for TGF-β, 4.6 pg/mL.

### Statistical Methods

Statistical analyses were performed using Graph Prism 5 software (GraphPad Software, USA). Data is given as mean ± standard error of the mean (SEM). Two-sided Student's *t*-tests for paired comparisons were used to calculate significances. Bonferroni-Holm correction was used to adjust obtained *P* values for multiple testing. A *P* value <0.05 was considered statistically significant.

## Results

Cell culture supernatants obtained from PBMC after 24 h evidenced IL-1ra levels of  $388.3 \pm 51.5$  pg/mL in the control group (medium) and  $276.8 \pm 39.0$  pg/mL in wells supplemented with PBS without calcium and magnesium. When adding PBS containing both calcium and magnesium to cell cultures, this value increased to  $636.7 \pm 61.3$  pg/mL. This effect could be totally abrogated by adding autologous EDTA containing plasma, as evidenced by values of  $27.1 \pm 15.9$  pg/mL (Figure 1).

Since the addition of +/+ PBS induced an increment of IL-1ra levels, we also tested for other pro- and anti-inflammatory cytokines (IL-1β, IL-4, IL-10, and TGF-β). No changes were found for IL-1β; values ranged below or slightly above detection limit (0 to 8.3 pg/mL). Similar results were obtained when analyzing PBMC-derived cell culture supernatants for anti-inflammatory cytokines. No major differences were detected either for IL-4, IL-10, or TGF-β.

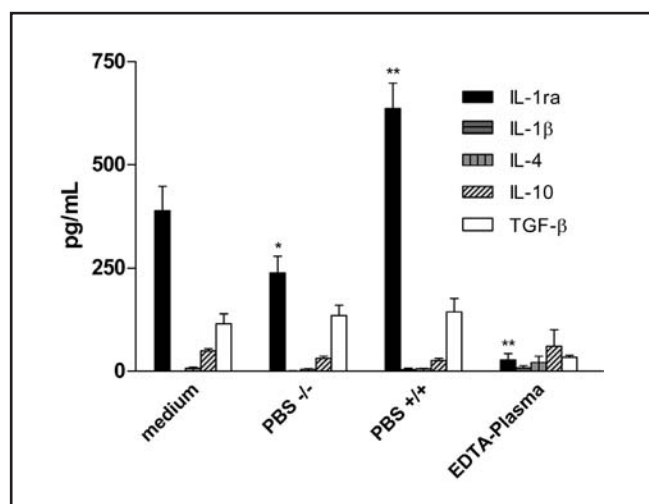

**Figure 1** Cytokine levels of IL-1ra, IL-1β, IL-4, and TGF-β in supernatants from PBMCs collected after 24 h. Adding calcium- and magnesium-containing PBS to cell cultures increases values of IL-1ra, whereas addition of EDTA-plasma leads to a strong reduction of cytokine release. \**P* < 0.05, \*\* *P* < 0.01 versus medium.

To further prove our data, we performed the same set of experiments and added increasing doses of calcium- and magnesium-containing PBS to PBMC cultures. We found a dose-dependent increment in IL-1ra supernatant levels (levels of  $636.7 \pm 61.3$  pg/mL at  $1 \times +/+$  PBS,  $1282.3 \pm 351.2$  pg/mL at  $1.25 \times +/+$  PBS,  $1439.6 \pm 205.5$  pg/mL at  $1.5 \times$  PBS, and  $1,908.8 \pm 46.4$  pg/mL at  $2 \times +/+$  PBS. No dose-dependency was observed for PBMC cell culture supernatants analyzed for IL-1 $\beta$ , IL-4, IL-10, or TGF- $\beta$  (Figure 2).

We also found no significant differences in IL-1ra levels after incubation periods of 30, 60, 120, and 180 min, thus suggesting that a prolonged time of exposure to heightened extracellular ion levels during cell culture is required to influence cytokine secretion (Figure 3).

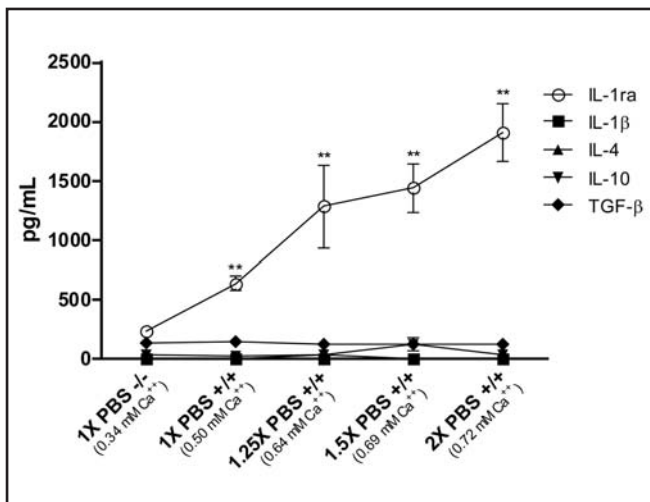

**Figure 2** Dose-dependent effect of supplementing PBMC cell cultures with increasing concentrations of calcium- and magnesium-containing PBS, thus resulting in heightened levels of IL-1 receptor antagonist. \* $P < 0.05$ , \*\* $P < 0.01$  versus PBS without calcium and magnesium.

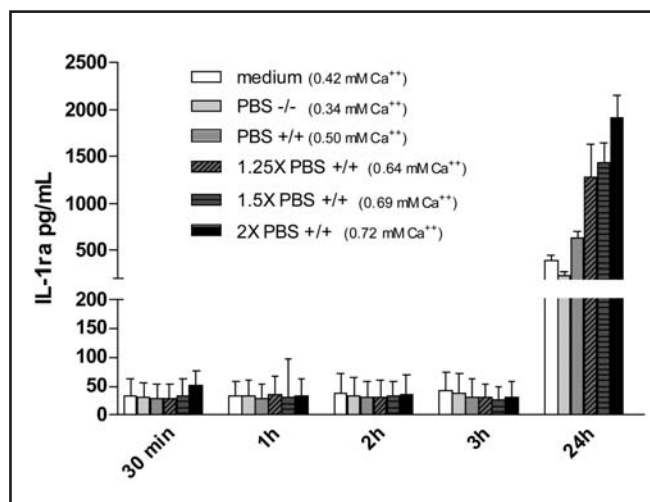

**Figure 3** Short-term responses of IL-1ra secretion by human PBMC after incubation times of 30 min to 3 h. No significant differences were observed between groups at short incubation intervals. Heightened extracellular ion concentrations in medium containing increasing levels of +/- PBS seem to have an influence on cellular IL-1ra release only after prolonged exposure times.

## Discussion

In this present study, we provide evidence of a significant effect of PBS containing calcium and magnesium on cell cultures of human PBMCs. Because PBS either in  $-/-$  or  $+/+$  formulations is used ubiquitously in laboratories, cellular responses induced after contact or co-incubation with these solutions are evident. In support of this hypothesis, addition of EDTA-plasma significantly abrogates cytokine secretion, in particular of IL-1ra. As EDTA complexes free  $\text{Ca}^{++}$  ions and therefore inhibit calcium-dependent cellular functions,<sup>17</sup> we believe that the effects seen by  $+/+$  PBS are  $\text{Ca}^{++}$  triggered and cause interactions which can initiate increases in cytokine release.

Increasing extracellular calcium gradients were shown to play an integral part in inflammatory cell recruitment to sites of infection and apoptosis. This mechanism might well be of importance in *in vitro* conditions. Interestingly, in contrast to the described pro-inflammatory effect of  $\text{Ca}^{++}$ , we found a dose-dependent relationship with the secretion of an anti-inflammatory mediator (IL-1ra) *in vitro*. IL-1ra, predominantly secreted by monocytes,<sup>18-19</sup> interferes with the induction of a pro-inflammatory state by inhibiting the cellular interactions of IL-1 on many cell types such T-, B-, and mononuclear cells.

Since, during most laboratory applications, cells are exposed to PBS solutions for rather short intervals (eg, minutes and hours), we tested the impact of  $+/+$  PBS in a time-course experiment. No changes of IL-1ra levels were detected within the first 3 h of incubation.

These results indicate that increasing extracellular ion concentrations such as calcium can also mediate anti-inflammatory cellular mechanisms by an initiation of IL-1ra cytokine release; however, further investigations are required to address this question. LM

**Acknowledgments:** Infrastructure and financial support for materials and reagents was granted by the Medical University Vienna, Research Laboratory, Department of Surgery. We are thankful to all participants who voluntarily supported our investigation. Furthermore, we want to thank Dr. Nickl for performing laboratory experiments and Dr. Hoetzenecker for helping to edit this manuscript. No conflicts of interest are stated. Hendrik Jan Ankersmit is corresponding author (hendrik.ankersmit@meduniwien.ac.at).

1. Bolego C, Buccellati C, Prada A, et al. Critical role of COX-1 in prostacyclin production by human endothelial cells under modification of hydroperoxide tone. *FASEB J*. 2008 Oct 6. [Epub ahead of print].
2. Wang HL, Miyauchi M, Takata T. Initial attachment of osteoblasts to various guided bone regeneration membranes: An *in vitro* study. *J Periodontol Res*. 2002;37:340–344.
3. Kalka C, Masuda H, Takahashi T, et al. Transplantation of ex vivo expanded endothelial progenitor cells for therapeutic neovascularization. *Proc Natl Acad Sci USA*. 2000;97:3422–3427.
4. Moldenhauer A, Nociari MM, Dias S, et al. Optimized culture conditions for the generation of dendritic cells from peripheral blood monocytes. *Vox Sang*. 2003;84:228–236.
5. Pollreis A, Assinger A, Hacker S, et al. Intravenous immunoglobulins induce CD32-mediated platelet aggregation *in vitro*. *Br J Dermatol*. 2008;159:578–584.
6. Jing R, Wang H, Jiang S, et al. Up-regulation of the receptor for advanced glycation end product (RAGE) in esophageal cancer and down-regulation in lung cancer and their relationship to clinicopathological features. *Lab Med*. 2008;39:661–667.

7. Cheng H, Lederer WJ. Calcium sparks. *Physiol Rev.* 2008;88:1491–545.
8. Lynch RE. Ionized calcium: Pediatric perspective. *Pediatr Clin North Am.* 1990;37:373–389.
9. Olszak IT, Poznansky MC, Evans RH, et al. Extracellular calcium elicits a chemokinetic response from monocytes in vitro and in vivo. *J Clin Invest.* 2000;105:1299–1305.
10. Hotchkiss RS, Karl IE. Calcium: A regulator of the inflammatory response in endotoxemia and sepsis. *New Horiz.* 1996;4:58–71.
11. Harfi I, Corazza F, D'Hondt S, et al. Differential calcium regulation of proinflammatory activities in human neutrophils exposed to the neuropeptide pituitary adenylate cyclase-activating protein. *J Immunol.* 2005;175:4091–4102.
12. Honda Y, Anada T, Kamakura S, et al. Elevated extracellular calcium stimulates secretion of bone morphogenetic protein 2 by a macrophage cell line. *Biochem Biophys Res Commun.* 2006;345:1155–1160.
13. Yamaguchi T, Kifor O, Chattopadhyay N, et al. Extracellular calcium (Ca<sup>2+</sup>)-sensing receptor in a mouse monocyte-macrophage cell line (J774): Potential mediator of the actions of Ca<sup>2+</sup> on the function of J774 cells. *J Bone Miner Res.* 1998;13:1390–1397.
14. Bigler CF, Norris DA, Weston WL, et al. Interleukin-1 receptor antagonist production by human keratinocytes. *J Invest Dermatol.* 1992;98:38–44.
15. Sieling PA, Abrams JS, Yamamura M, et al. Immunosuppressive roles for IL-10 and IL-4 in human infection. In vitro modulation of T cell responses in leprosy. *J Immunol.* 1993;150:5501–5510.
16. Bzowska M, Guzik K, Barczyk K, et al. Increased IL-10 production during spontaneous apoptosis of monocytes. *Eur J Immunol.* 2002;32:2011–2020.
17. Powis DA. Failure of calcium to stimulate Na, K-ATPase in the presence of EDTA. *Experientia.* 1985;41:1048–1051.
18. Conti P, Panara MR, Barbacane RC, et al. Human recombinant IL-1 receptor antagonist (IL-1Ra) inhibits leukotriene B<sub>4</sub> generation from human monocyte suspensions stimulated by lipopolysaccharide (LPS). *Clin Exp Immunol.* 1993;91:526–531.
19. Arend WP, Welgus HG, Thompson RC, et al. Biological properties of recombinant human monocyte-derived interleukin 1 receptor antagonist. *J Clin Invest.* 1990;85:1694–1697.



# First and Only FDA Cleared Digital Cytology System

**Genius™ Cervical AI**

**Genius™ Review Station**

**Genius™ Digital Imager**

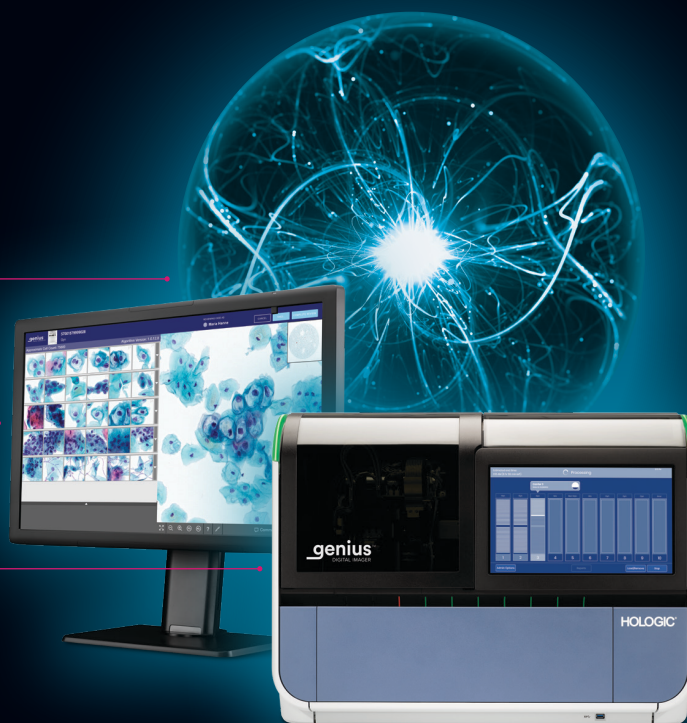

## Empower Your Genius With Ours

**Make a Greater Impact on Cervical Cancer**  
with the Advanced Technology of the  
Genius™ Digital Diagnostics System

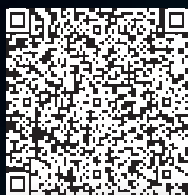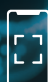

**Click or Scan**  
to discover more

ADS-04159-001 Rev 001 © 2024 Hologic, Inc. All rights reserved. Hologic, Genius, and associated logos are trademarks and/or registered trademarks of Hologic, Inc. and/or its subsidiaries in the United States and/or other countries. This information is intended for medical professionals in the U.S. and other markets and is not intended as a product solicitation or promotion where such activities are prohibited. Because Hologic materials are distributed through websites, podcasts and tradeshows, it is not always possible to control where such materials appear. For specific information on what products are available for sale in a particular country, please contact your Hologic representative or write to [diagnostic.solutions@hologic.com](mailto:diagnostic.solutions@hologic.com).

**genius™**  
DIGITAL DIAGNOSTICS
